1                    **Biological network inference from single-cell multi-omics data using**  
2                                            **heterogeneous graph transformer**

3  
4 Anjun Ma<sup>1,2,\*</sup>, Xiaoying Wang<sup>3,\*</sup>, Cankun Wang<sup>1</sup>, Jingxian Li<sup>3</sup>, Tong Xiao<sup>2</sup>, Juexing Wang<sup>4</sup>,  
5 Yuzhou Chang<sup>1,2</sup>, Yang Li<sup>1</sup>, Yutao Liu<sup>3</sup>, Shaopeng Gu<sup>1</sup>, Duolin Wang<sup>4</sup>, Yuexu Jiang<sup>4</sup>, Jinpu  
6 Li<sup>4</sup>, Li Su<sup>4</sup>, Zihai Li<sup>2</sup>, Bingqiang Liu<sup>3,\$</sup>, Dong Xu<sup>4,\$</sup>, Qin Ma<sup>1,2,\$</sup>

7  
8 <sup>1</sup> Department of Biomedical Informatics, College of Medicine, The Ohio State University,  
9 Columbus, OH, 43210, USA,

10 <sup>2</sup> Pelotonia Institute for Immuno-Oncology, The Ohio State University Comprehensive  
11 Cancer Center, Columbus, OH, 43210, USA,

12 <sup>3</sup> School of Mathematics, Shandong University, Jinan, Shandong, 250100, China,

13 <sup>4</sup> Department of Electrical Engineering and Computer Science, and Christopher S. Bond  
14 Life Sciences Center, University of Missouri, Columbia, MO 65211, USA.

15  
16 \* These authors contributed equally to the paper as first authors

17 \$ To whom correspondence should be addressed

18  
19 **Abstract**

20 We present DeepMAPS, a deep learning platform for cell-type-specific biological gene  
21 network inference from single-cell multi-omics (scMulti-omics). DeepMAPS includes both  
22 cells and genes in a heterogeneous graph to infer cell-cell, cell-gene, and gene-gene  
23 relations simultaneously. The graph attention neural network considers a cell and a gene  
24 with both local and global information, making DeepMAPS more robust to data noises. We  
25 benchmarked DeepMAPS on 18 datasets for cell clustering and network inference, and  
26 the results showed that our method outperforms various existing tools. We further applied  
27 DeepMAPS on a case study of lung tumor leukocyte CITE-seq data and observed superior  
28 performance in cell clustering, and predicted biologically meaningful cell-cell  
29 communication pathways based on the inferred gene networks. To improve the feasibility  
30 and ensure the reproducibility of analyzing scMulti-omics data, we deployed a webserver  
31 with multi-functions and various visualizations. Overall, we valued DeepMAPS as a novel  
32 platform of the state-of-the-art deep learning model in the single-cell study and can  
33 promote the use of scMulti-omics data in the community.

34  
35 **Keywords:** Single cell multimodal omics, heterogeneous graph transformer, graph neural  
36 network, multi-head attention framework, biological network, single-cell sequencing data  
37 analysis webserver

38  
39

40 **Main**

41 Single-cell sequencing, such as single-cell RNA sequencing (scRNA-seq) and single-cell  
42 ATAC sequencing (scATAC-seq), reshapes the way of investigating cellular heterogeneity  
43 and brings novel insights in neuroscience, cancer research, immuno-oncology, drug  
44 response, etc<sup>1, 2</sup>. Individual single-cell modality can only reflect the snapshot of genetic  
45 features and partially depict the peculiarity of cells, leading to characterization biases in  
46 complex biological systems<sup>2, 3</sup>. To fully capture the intricacy of complex molecular  
47 mechanism and cellular heterogeneity, single-cell multi-omics (scMulti-omics) generate  
48 and quantify multiple modalities in the single-cell level simultaneously, and such  
49 measurements advance various biological studies equipped with robust computational  
50 analysis methods<sup>4</sup>.

51

52 The existing tools for integrative analyses of scMulti-omics data, e.g., Seurat<sup>5</sup>, MOFA+<sup>6</sup>,  
53 Harmony<sup>7</sup>, and totalVI<sup>8</sup>, achieve reliable prediction of cell types and states, recover  
54 dropouts in single-modality data analysis, remove batch effects, reveal relationships or  
55 alignment among various modalities, and toward a mechanistic understanding of cell-type-  
56 specific gene regulations. However, the cross-talk among cells and different molecular  
57 modalities (e.g., genes and proteins) are usually missing in an independent hypothesis.  
58 Hence, these models lack the ability to infer the underlying biological networks of diverse  
59 cell types and have limited power to elucidate the response of these complex networks to  
60 external stimuli in specific cell types.

61

62 Recently, graph neural network (GNN) shows its unique strength in learning low-  
63 dimensional representations of individual cells by propagating neighbor cells' features and  
64 constructing cell-cell relations in a global cell graph<sup>9-12</sup>. For example, our in-house tool  
65 scGNN is a novel GNN model that has demonstrated the superior performance of cell  
66 clustering and gene imputation based on the large-scale scRNA-seq data<sup>13</sup>. Furthermore,  
67 a heterogeneous graph is a multi-relational model which provides a natural representation  
68 framework for integrating scMulti-omics data and learning the underlying cell-type-specific  
69 biological networks. Moreover, the recent development in the attention mechanism for  
70 modeling and integrating heterogeneous relationships make deep learning models  
71 explainable and enable the inference of cell-type-specific biological networks<sup>14, 15</sup>.

72

73 To this end, we develop the first-of-its-kind model **DeepMAPS (Deep learning-based Multi-**  
74 **omics Analysis Platform for Single-cell data)**, which is a heterogeneous graph transformer  
75 framework for biological network inference from scMulti-omics data. DeepMAPS  
76 formulates high-level representations of relations among cells and genes in a  
77 heterogeneous graph, with cells and genes as the two disjoint node sets in this graph.  
78 Projecting the features of genes and cells into the same latent space is an effective way  
79 to harmonize the imbalance of different batches and lies a solid foundation of cell  
80 clustering (i.e., node clustering) and the prediction of cell-gene and gene-gene relations

81 in a specific cell cluster (i.e., link prediction). Most importantly, the attention mechanism in  
82 this transformer model enhances the biological interpretability and enables the  
83 identification of important gene modules in each cell cluster. Overall, DeepMAPS is an  
84 end-to-end and hypotheses-free framework and provides the first deep learning tool to  
85 infer the cell-type-specific biological networks from scMulti-omics data.

86  
87 In this study, we evaluated DeepMAPS on 18 scMulti-omics datasets (including  
88 transcriptomic, epigenomic, and proteomic data) and our method outperformed existing  
89 tools in terms of cell clustering accuracy and biological network inference (i.e., gene  
90 association network and gene regulatory network). Specifically, DeepMAPS shows its  
91 superior power in characterizing cellular heterogeneity since it can pass messages of  
92 neighbor cells and genes to employ the identification of highly important genes in each  
93 cell cluster. To further validate the biological insight inferred from DeepMAPS, we  
94 performed a case study on a lung tumor leukocyte CITE-seq data. By jointly analyzing  
95 gene expression and protein abundance, DeepMAPS accurately identified and annotated  
96 13 cell types based on curated markers, which cannot be fully elucidated by a single  
97 modality. We also proved that the embedding features identified in DeepMAPS capture  
98 the true signals and amplify them when the original signals are weak. Besides, we also  
99 identified biologically meaningful cell-cell communication pathways between dendritic cells  
100 and tissue resident memory CD4 T cells based on the gene network inferred in the two  
101 clusters. We deployed DeepMAPS as a code-free web portal along with Docker, to  
102 ensure the reproducibility of scMulti-omics data analysis and lessen the programming  
103 burden for biologists who lack sufficient computational skills or resources (**Fig. 1**).

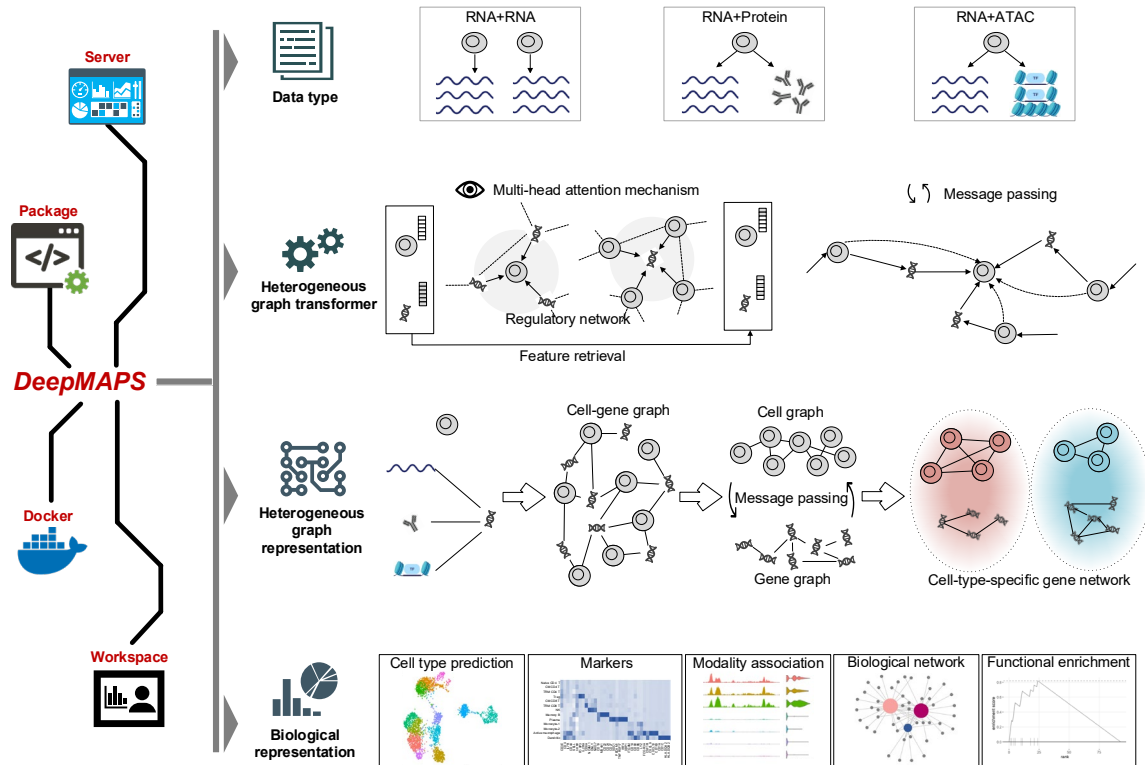

105 **Fig. 1.** DeepMAPS is a deep learning-based Multi-omics Analysis Platform for Single-cell data. It  
 106 allows the joint analysis of multiple scRNA-seq, CITE-seq, and matched single-cell RNA and ATAC-  
 107 seq data. The core method includes the representation of cell-gene relations via a heterogeneous  
 108 graph and a transformer with a graph attention mechanism. DeepMAPS provides interactive and  
 109 interpretable graphical representations to deliver cell clusters and various cell-type-specific  
 110 biological networks depending on modality types. Eventually, DeepMAPS is delivered as a web  
 111 portal to ensure robustness and reproducibility, along with a docker container. Workspace is  
 112 committed to being provided for users for job saving and retrieval. DeepMAPS also supports  
 113 diverse interpretations include but not limited to joint cell clustering, marker identification, modality  
 114 associations, cell-type-specific biological network inference, and functional enrichment.

115

## 116 Results

### 117 Overview of DeepMAPS

118 There are five steps in DeepMAPS to fulfill the joint analysis of scMulti-omics data (**Fig. 2**  
 119 and **Methods**). (i) Data is preprocessed by removing low-quality cells and modalities and  
 120 then applied with different normalization methods according to specific data types (ii) An  
 121 integrated cell-gene matrix will be generated by representing the combined activity of each  
 122 gene in each cell. Different data integration methods are applied for different scMulti-omics  
 123 data types. (iii) A heterogeneous graph transformer (**HGT**) model is built to jointly learn the  
 124 low-dimensional embedding for cells and genes and generate an attention score to  
 125 indicate the importance of a gene to a cell. (iv) Cell clustering and identification of  
 126 functional gene modules in each cell cluster based on HGT-learned embeddings and

127 attention score. (v) Diverse biological networks, e.g., gene regulatory networks and gene  
128 association networks, are inferred in each cell type.

129

130 To enable the simultaneous learning of joint representatives of cells and genes, we first  
131 generate a cell-gene matrix integrating all heterogeneous information of the input scMulti-  
132 omics data. A heterogeneous graph with cell nodes and gene nodes is then constructed,  
133 where a cell-gene edge represents the integrated gene activity score in the matrix, and  
134 the initial embedding of each node is learned from the gene-cell integrated matrix via a  
135 two-layer GNN graph autoencoder. The entire heterogeneous graph is then sent to a graph  
136 autoencoder to learn relations among cells and genes and update the embedding of each  
137 node. Here, DeepMAPS adopts a heterogeneous multi-head attention mechanism to  
138 model both overall topological information (global relationship) and neighbor message  
139 passing (local relationship) on the heterogeneous graph.

140

141 In a HGT layer, each node (either a cell or a gene) will be considered as a target, and  
142 DeepMAPS evaluates the importance of its neighbor nodes and the amount of information  
143 that can be passed to the target based on the synergy of node embedding. As a result,  
144 cells and genes with high positively correlated embeddings are more likely to exchange  
145 messages with each other, thus tending to maximize the similarity and disagreement of  
146 embeddings. To make the unsupervised training process feasible on a large  
147 heterogeneous graph, DeepMAPS is first performed on 50 subgraphs subtracted from the  
148 heterogeneous graph, covering a minimum coverage of 50% of all nodes, to train a shared  
149 parameters between different nodes, which is later been used for testing the whole graph.  
150 As an important training outcome, an attention score will be given to represent the  
151 importance of a gene to a cell. A gene with high attention to a cell implies that the gene is  
152 of relatively much importance for defining cell identity and characterizing cell heterogeneity.  
153 This insight will lead to reliable gene association networks in each cell cluster as the final  
154 output of DeepMAPS.

155

156 We applied the graph-based invariant-sampling method to make DeepMAPS feasible for  
157 handling large-scale heterogeneous graphs<sup>16</sup>. The basic idea is to keep a separate node  
158 budget for each node type (i.e., cell node and gene node) and to sample an equal number  
159 of nodes per type with a sampling strategy to reduce variance. For an already sampled  
160 node, we will add all its direct neighbors into the corresponding budget and add its  
161 normalized degree to these neighbors, which will then be used to calculate the sampling  
162 probability. Such normalization is equivalent to accumulating the random walk probability  
163 of each sampled node to its neighborhood, avoiding the sampling being dominated by  
164 high-degree nodes. The sampler constructs a number of small subgraphs from the given  
165 giant graph, and these subgraphs can be fed in batches with multiple GPUs. These  
166 distributed training results will be collected to build the whole graph with representations  
167 on the head node.

168

169 The gene-gene and gene-cell relations predicted via the HGT model can only depict the  
170 co-expression correlations as well as the gene activity in cells in the dataset rather than  
171 reflect the gene module specificity in a cell cluster. Therefore, we build a Steiner Forest  
172 Problem (SFP) model on a sparse heterogeneous graph to identify genes with higher  
173 attention scores and similar embedding features uniquely in a cell cluster. We firstly  
174 construct a sparse weighted heterogeneous graph based on the gene-gene and gene-cell  
175 relations, and then build an SFP model based on this heterogeneous graph and cell  
176 clusters. The gene-gene and gene-cell relations in the optimized solution of the SFP model  
177 mirror the co-expression relations among genes and the specificity of genes to a cell type.  
178 A gene network established from SFP contains genes that are highly associated based on  
179 their gene activities and are of the most important in characterizing the identity of that cell  
180 cluster, which is considered to be cell-type-active.

181

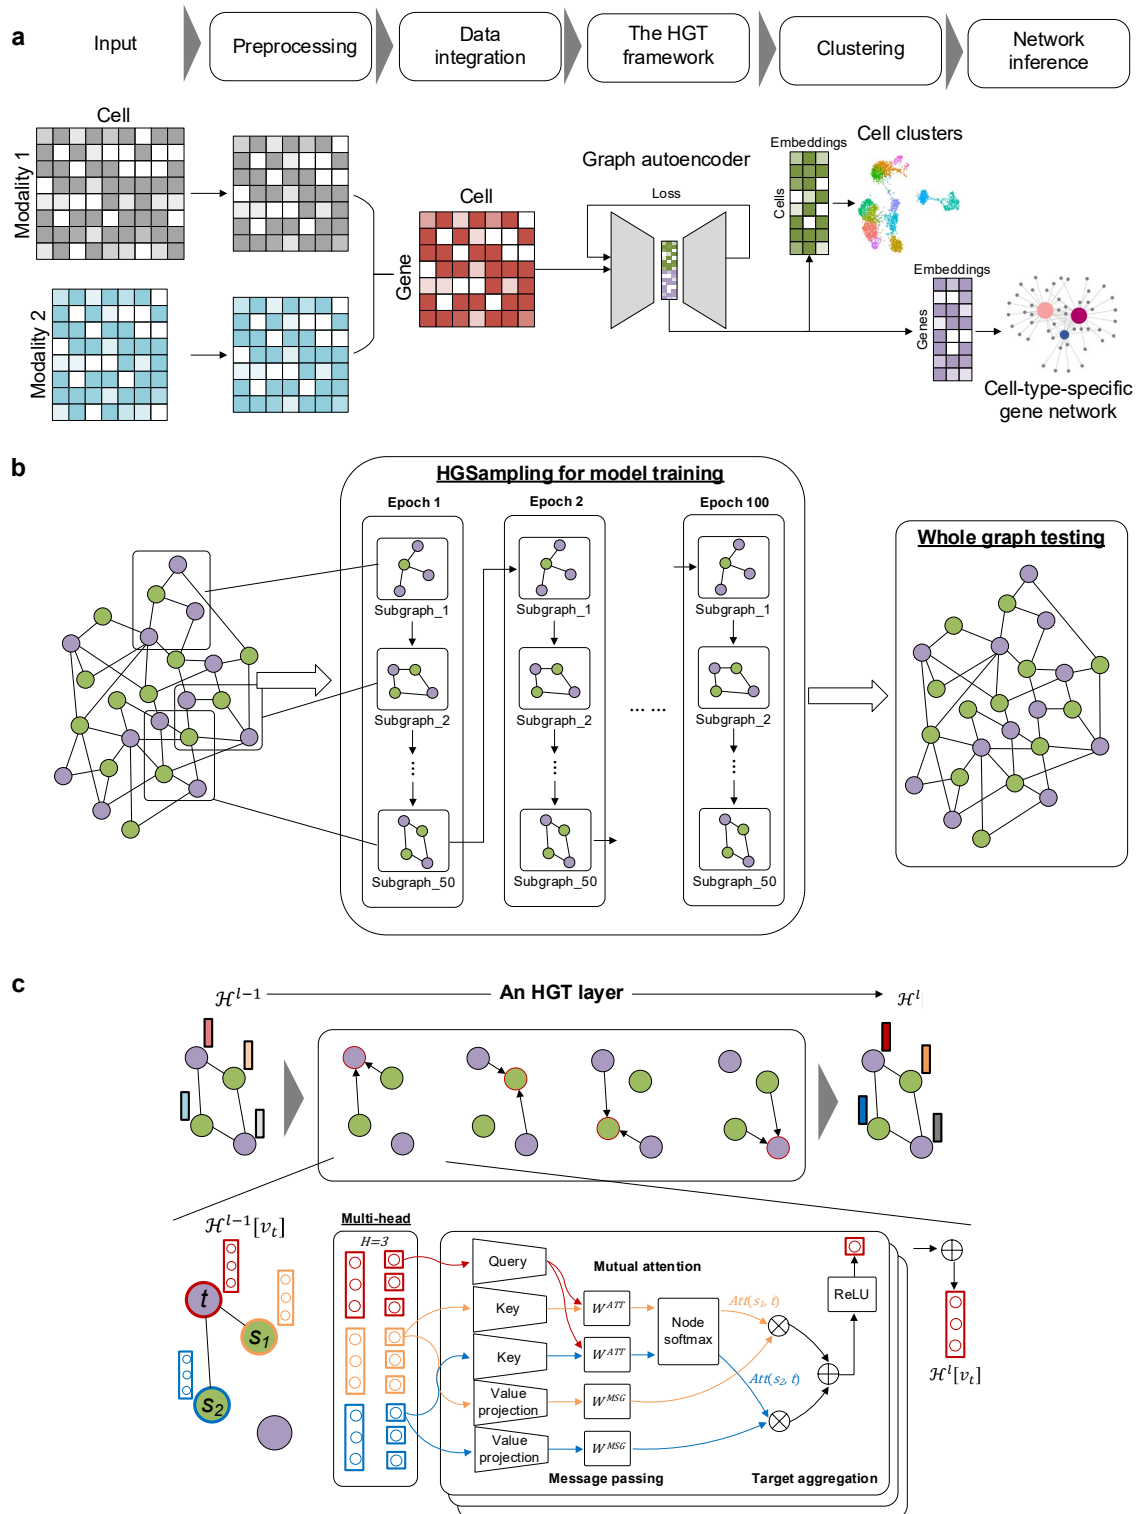

183 **Fig. 2:** DeepMAPS framework. **(a)** The five major steps and graphical illustration in DeepMAPS.  
 184 **(b)** Relations in the heterogeneous graph of cells and genes will be learned in an HGT-based graph  
 185 autoencoder. The hyperparameters are first trained in 50 subgraphs and 100 epochs and then  
 186 applied to the testing in the whole graph. **(c)** For each subgraph training and the whole graph testing,

187 multiple HGT layers are applied. A toy example with two cells (purple) and two genes (green) are  
188 shown for one HGT layer. The embeddings of the target cell (red) and two neighbor genes (orange  
189 and blue) are separated evenly into three heads. For each head, the HGT layer calculates the  
190 attention score of neighbor genes to the target cell and updates the target's embedding of this head.  
191 The entire target cell embedding is updated by concatenating all three heads to complete one HGT  
192 layer.

193

### 194 ***DeepMAPS achieves superior performances in joint cell clustering and biological*** 195 ***network inference from scMulti-omics data***

196 We collected 18 scMulti-omics datasets, including two multiple scRNA-seq data (Data 1-  
197 2), eight CITE-seq data (Data 3-10), and eight matched scRNA-seq and scATAC-seq  
198 (scRNA-ATAC-seq) data measured from the same cell (Data 11-18), to benchmark  
199 DeepMAPS (**Supplementary Table S1**). Specifically, Data 1-2 and 17-18 have  
200 benchmark annotations provided in the original manuscript. These data cover a number  
201 of cells ranging from 549 to 30,672; an average read depth (consider scRNA-seq data  
202 only) ranging from 2,933 to 645,526; a zero-expression rate (consider scRNA-seq data  
203 only) from 71% to 97% (**Fig. 3a**).

204

205 To evaluate the performance of joint cell clustering in all three scMulti-omics data types,  
206 we compare DeepMAPS with four benchmarking tools using default settings, including  
207 Seurat, MOFA+, TotalVI, and Harmony (**Methods**), in terms of the Average Silhouette  
208 Weight (ASW) (**Fig. 3a**) and Adjusted Rand Index (ARI) (**Fig. 3b**). DeepMAPS was trained  
209 by each scMulti-omics data type and each dataset in an unsupervised way. The one set  
210 of parameter was chosen as default for all datasets in the same data type based on the  
211 grid optimization of hyper-parameter combinations (**Supplementary Table 3-5**). Results  
212 clearly showed that, in all three scenarios of scMulti-omics data, DeepMAPS distinctly  
213 outperformed the others in most cases. Note that, for Data 2 and 18, though DeepMAPS  
214 did not achieve the best ASW than other tools, its performance regarding ARI comparison  
215 to the benchmark label is the highest.

216

217 We showed UMAP results of cell clustering of Data 17, a cancer cell line data (n=549) with  
218 benchmarked cell labels of scRNA-ATAC-seq data (**Fig. 3c**). By comparing with the  
219 original cell line labels, we found that DeepMAPS is the only tool that accurately separate  
220 each cell type with minimum mismatches (ARI=0.97), while for Seurat (ARI=0.88) and  
221 MOFA+ (ARI=0.79), either PDX1 or PDX2 population was mistakenly divided into two  
222 clusters and include more mismatches. For datasets without benchmark labels,  
223 DeepMAPS also showed good UMAP visualization than other tools without having mixture  
224 clusters or separated random cells (**Fig. 3d**).

225

226 To evaluate the robustness of DeepMAPS, we performed a leave-out test on benchmark  
227 datasets. For data with benchmark labels, we first filter cells by removing a cluster of cells



228 based on benchmark labels and then perform analysis using DeepMAPS and benchmark  
229 tools; for other datasets, we removed cells based on clusters identified from each tool.  
230 The results showed that DeepMAPS achieved superior performance compared to all other  
231 benchmarking methods (**Fig. 3e**). Another test was performed on a series of data  
232 simulated for different read depth rates (**Fig. 3f**). For each testing dataset, the clustering  
233 results of DeepMAPS are consistent with high AWS or ARI, indicating that the message  
234 passing and attention mechanism used in DeepMAPS helped maintain cell-cell relations  
235 and tolerance to read depth.

236

237 We further evaluated the two kinds of biological networks the DeepMAPS can deliver. For  
238 the gene association network (for all scMulti-omics data types), we considered using the  
239 centrality scores and enriched pathways to compare DeepMAPS with IRIS3. IRIS3 is an  
240 in-house tool for the identification of cell-type-specific regulon and gene regulatory network  
241 construction from scRNA-seq data. It has superior performance than other public tools,  
242 such as SCENIC. We also compared our results to the co-expression network constructed  
243 from the whole gene list with significance cutoffs, which is a widely used way in single-cell  
244 studies. Both the average closeness centrality and eigenvector centrality scores of  
245 networks constructed in DeepMAPS showed significantly higher scores than the other two  
246 methods using all 18 benchmark datasets (**Fig. 3g-h**). Moreover, for the gene regulatory  
247 network constructed from scRNA-ATAC-seq data, we evaluated the number of significantly  
248 enriched pathways in a TF-regulon and in a cell-type-specific regulon (**Fig. 3i-j**). The  
249 results indicated that DeepMAPS is capable of constructing more compatible and  
250 biologically reasonable gene networks in each cell type and outperformed the other  
251 methods.

252

253

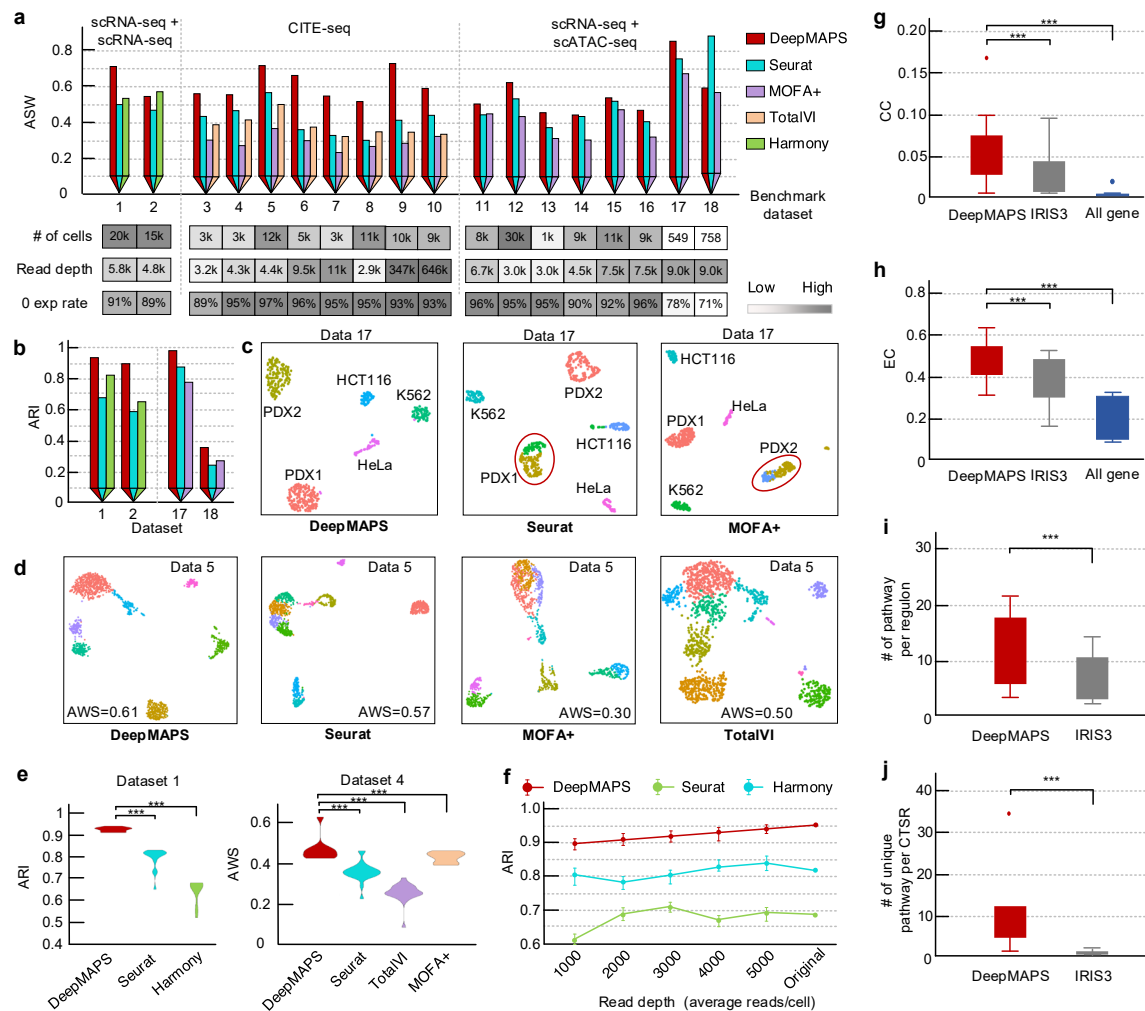

255 **Fig. 3:** Benchmarking of DeepMAPS in terms of cell clustering and biological network inference.  
 256 **(a)** Benchmarking cell clustering results in all 18 datasets in terms of average silhouette weight  
 257 without using benchmark cell labels. Due to the capability, different benchmarking tools were  
 258 selected for the comparison. We also show heatmaps to indicate the number of total cells, average  
 259 gene expression read depth per cell, and average RNA zero expression rate in each data. **(b)**  
 260 Results comparison on four datasets with benchmarking cell labels in terms of adjusted rand index.  
 261 **(c)** UMAP comparison of Data 17 (with benchmark labels) between DeepMAPS and other tools.  
 262 Cluster labels were annotated based on cell correspondence to the original cell label. **(d)** UMAP  
 263 comparison of Data 5 (without benchmark labels) between DeepMAPS and other tools. **(e)**  
 264 Robustness test of DeepMAPS using cell cluster leave-out method for Data 1 (with benchmark  
 265 label) and Data 4 (without benchmark label). Details can be found in the Method section. **(f)**  
 266 Robustness test of DeepMAPS to different read depth on Data 1. **(g-h)** Evaluation and comparison  
 267 of gene association network inference of DeepMAPS and other methods. Closeness centrality and  
 268 betweenness centrality were used to indicate the compactness and connectivity of networks  
 269 inferred from different methods. **(i-j)** Evaluation and comparison of gene regulatory network

270 (regulons) identified in DeepMAPS and IRIS3, based on the number of functional pathways  
271 enriched in a regulon or cell-type-specific regulon.

272

### 273 ***DeepMAPS accurately identify cell types in PBMC and lung tumor immune CITE-*** 274 ***seq data***

275 To demonstrate the joint representation of scMulti-omics in characterize cell identities, we  
276 demonstrate a case study that applies DeepMAPS on a published PBMC and lung tumor  
277 leukocytes CITE-seq data. The dataset includes RNA and protein measured on 3,485 cells.  
278 We identified 13 cell clusters, including four CD4 T cell groups (Naïve, central memory  
279 (CM), tissue resident memory (TRM), and regulatory (Treg)), two CD8 T cell groups (CM  
280 and TRM), a natural killer group, a memory B cell group, a plasma cell group, two  
281 monocyte groups, one tumor-associated macrophage group, and a dendritic cell (DC)  
282 group, via DeepMAPS and annotated each cluster by visualizing expression levels of  
283 curated maker genes and proteins (**Fig. 4a**). Compared to cell types identified using only  
284 proteins or RNAs, we either isolated or accurately annotated cell populations that cannot  
285 be characterized in the individual modality analysis. For example, the expression levels of  
286 marker genes (CD4, IL7R, CD44, SELL, and CD69) in CD4 T cells are weak and  
287 undistinguishable, thus only CM and naïve CD4 T cell groups can be recognized using  
288 only scRNA-seq data (**Fig. 4b**), while the signal of marker proteins in CD4 T cells are much  
289 stronger and differentiable. Another example lies in the recognition of tumor associated  
290 macrophage in which the marker genes (CSF1R, CCR2, and MARCO) were identified to  
291 be uniquely expressed in RNA, while no specific protein markers can be used to annotate  
292 such cell group. Altogether, combining signals captured from both RNA and protein sides,  
293 DeepMAPS successfully identified biologically reasonable and meaningful cell types in the  
294 CITE-seq data.

295

296 We then zoomed in to compare the modality correlation between two cell types. We used  
297 the top differentially expressed genes and proteins between memory B cells and plasma  
298 cells and performed hierarchical clustering of the correlation matrix. The result clearly  
299 stratified these features into two anticorrelated modules: one associated with memory B  
300 cells and the other with plasma cells (**Fig. 4c**). Furthermore, we found that the features in  
301 the two modules significantly correlated with the axis of maturation captured by our HGT  
302 embeddings. We observed that the 51<sup>th</sup> HGT embedding showed distinctive differences  
303 between plasma cells and memory B cells (**Fig. 4d-e**). Similar findings were also observed  
304 for the comparison of EM CD8 T cells and TRM CD8 T cells, which showed a much closer  
305 relation when looking at expression correlations (**Fig. 4f**). Nevertheless, we can still find a  
306 representative HGT embedding (56<sup>th</sup>) that maintains embedding signals to well separate  
307 the two groups (**Fig. 4g-h**). These results point to a program of any two cell clusters  
308 consisting of coordinated activation and repression of multiple genes and proteins, leading  
309 to a gradual transition in cell state that can be captured by a specific dimension of the  
310 DeepMAPS latent HGT space.

311

312 Based on the cell types and raw data of genes and proteins' expression, we inferred cell-  
313 cell communication by using CellChat<sup>17</sup>. We constructed communication networks among  
314 different cell types within multiple signaling pathways as **Fig. 4i**. We further applied  
315 CellChat<sup>17</sup> to find any ligand-receptor interactions that have been validated between any  
316 cell types we identified. We observed an ALCAM signaling pathway existing between TRM  
317 CD4 T cells and DCs in the lung cancer tumor microenvironment (TME), of which DCs and  
318 TRM CD4 T cells serve as the major source and ligand of CD166. Previous studies  
319 showed that ALCAM on antigen-presenting DCs would interact with CD6 on T cell surface  
320 and contribute to T-cell activation and proliferation<sup>18-20</sup>. For another example, we also  
321 identified the involvement of NECTIN pathway during the interaction between the activated  
322 macrophages (source) and TRM CD8 T cells (target). This is consistent with the previous  
323 report that NECTIN (CD155) expressed on tumor-infiltrating macrophages could be  
324 immunosuppressive when interacting with surface receptors on CD8+ T cells in the lung  
325 cancer TME<sup>21, 22</sup>.

326

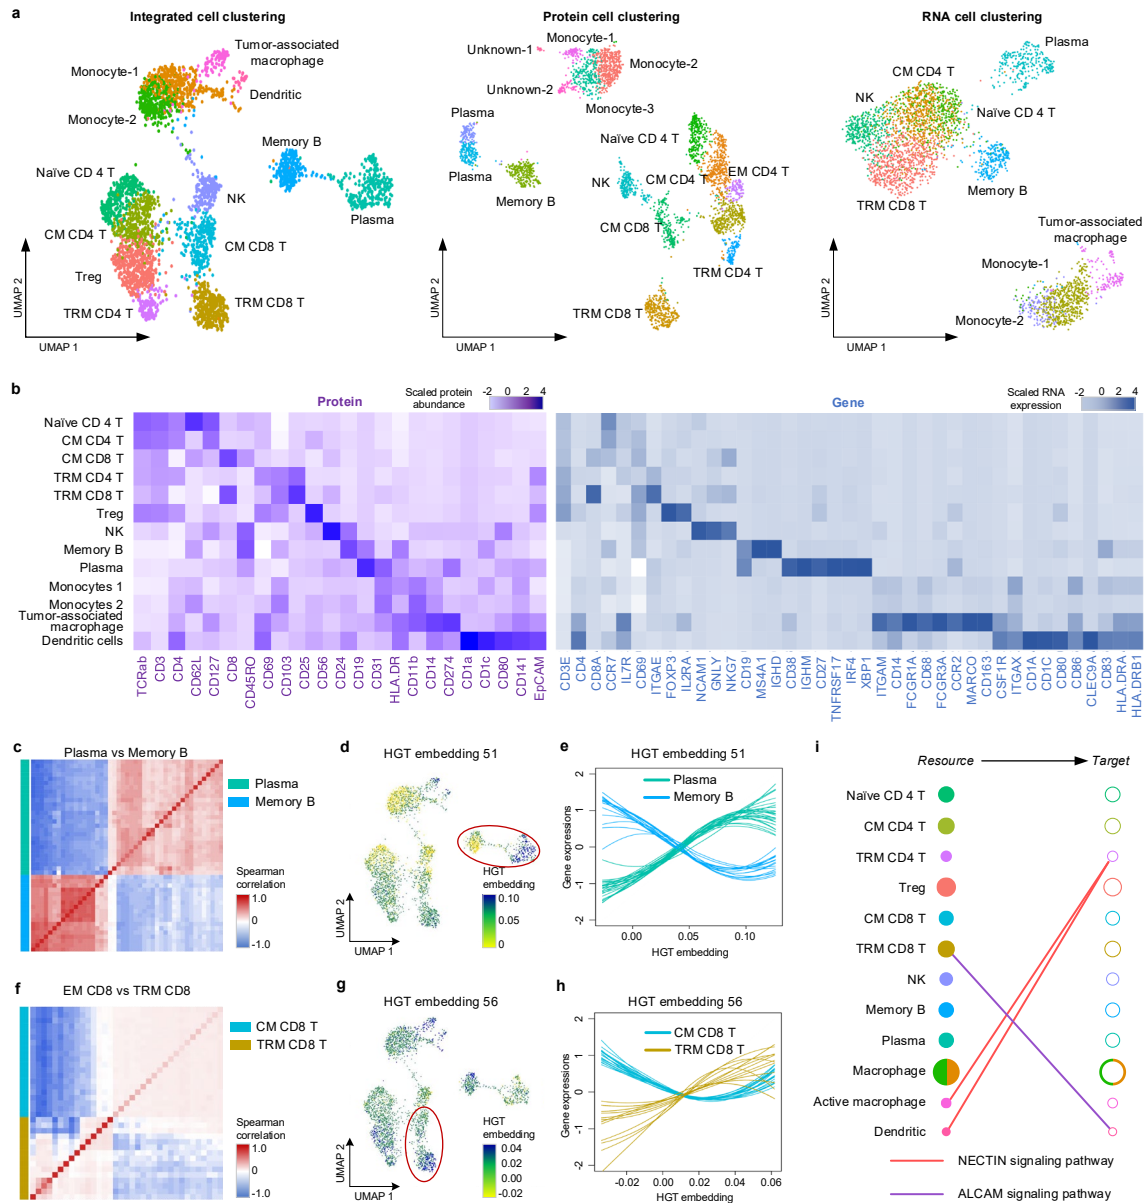

328 **Fig. 4:** DeepMAPS identifies the heterogeneity in CITE-seq data of PBMC and lung tumor  
 329 leukocytes. **(a)** UMAPs for DeepMAPS cell clustering results of integrating RNA and protein  
 330 information, only using protein, and only using RNA. Cell clusters were annotated based on curated  
 331 marker proteins and genes. **(b)** Heatmap of curated marker proteins and genes that determine the  
 332 cell clustering and annotation. **(c)** Heatmap of correlation comparison of top differentially expressed  
 333 genes and proteins in plasma cells and memory B cells. **(d)** UMAP is colored by the 51<sup>th</sup> embedding,  
 334 indicating distinct embedding representations in plasma cells and memory B cells. **(e)** Expression  
 335 of top differentially expressed genes and proteins in **c** as a function of the 51<sup>th</sup> embedding to  
 336 observe the pattern relations between plasma cells and memory B cells. Each line represents a  
 337 gene/protein, colored by cell types. For each gene, the line was drawn by a loess smoothing  
 338 function based on the corresponding embedding and scaled expression in a cell. **(f-h)** Similar

339 visualization was given for the comparison of EM CD8 T cells and TRM cd8 T cells in **c-e**. (i) Two  
340 signaling pathways, NECTIN and ALCAM, were shown to indicate the predicted cell-cell  
341 communications between two cell clusters.

342

### 343 ***DeepMAPS provides a multi-functional and user-friendly web portal for analyzing*** 344 ***scMulti-omics data***

345 Researchers who lack sufficient computational skills prefer to use web servers or dockers  
346 to lessen the programming burden of data analysis, and hence, a code-free and interactive  
347 platform for single-cell sequencing data analysis are urgently needed in the public domain.  
348 Considering the complexity of single-cell sequencing data, more and more web servers  
349 and dockers have been developed in the past three years<sup>23-35</sup> (**Supplementary Table 6**).  
350 However, most of these tools only provide minimal and basic functions such as cell  
351 clustering and differential gene analysis, and do not support the joint analysis of scMulti-  
352 omics data, especially lack sufficient support for biological network inference. To this end,  
353 we deliver DeepMAPS as the first-of-its kind web portal to support online and code-free  
354 computational analysis for scMulti-omics data. The web server supports the analysis of  
355 multiple RNA-seq data, CITE-seq data, and scRNA-ATAC-seq data using DeepMAPS.  
356 Other methods, e.g., Seurat, are also included as an alternative use for the users'  
357 convenience. Three major steps, data preprocessing, cell clustering and annotation, and  
358 network construction, are included in the server. The DeepMAPS server supports real-  
359 time computing and interactive graph representations. Users may register for an account  
360 to have their own workspace to store and share analytical results.

361

### 362 **Conclusion and discussion**

363 We highlighted DeepMAPS as the first deep learning framework that implements  
364 heterogeneous graph representation learning and graph transformer in the study of  
365 scMulti-omics data. By building a heterogeneous graph containing both cells and genes,  
366 DeepMAPS identified the joint embedding of both sides simultaneously and enabled the  
367 inference of cell-type-specific biological networks along with cell types in an intact  
368 framework. The application of heterogeneous graph transformer takes the advantages  
369 beyond graph neural network that considering not only the message from neighbor cells  
370 but also the attention of how such message should be passed to the target. In such a way,  
371 the information training and learning process in a graph can be largely shortened to  
372 consider cell impacts from a further distance.

373

374 While with the advantages and outperformed performances in analyzing scMulti-omics  
375 data, there are still rooms to further improve the power of DeepMAPS. First of all, the  
376 computational efficiency for super large datasets (e.g., more than 1 million cells) might be  
377 a practical issue considering the complexity of the heterogeneous graph representation  
378 (may contain billions of edges). Moreover, DeepMAPS is recommended to be run on  
379 GPUs and supercomputers, which leads to a potential problem of reproducibility. Different

380 GPU models have different floating-point numbers that may influence the precision of loss  
381 functions during the training process. That is to say, for different GPU models, DeepMAPS  
382 may generate different cell clustering and network results, which is the main reason that  
383 drives us to the development of webserver. Lastly, the current version of DeepMAPS is  
384 based on a bipartite heterogeneous graph with genes and cells. Separate preprocessing  
385 and integration steps are required to transfer different modalities all into genes and be  
386 integrated into a unique cell-gene matrix. To fully achieve an end-to-end framework for  
387 scMulti-omics analysis, the bipartite graph can be extended to a multipartite graph, where  
388 each modality can be included as a node type. Such multipartite heterogeneous graph can  
389 even include knowledgeable and biological information, such as known molecular  
390 regulations, and more than two modalities all in one graph. However, by including more  
391 node types, the computational burden will be increased geometrically, which requires a  
392 dedicated discovery of model optimization in the future.

393

394 In summary, we evaluate our DeepMAPS as a pioneer study for the joint analysis of  
395 scMulti-omics data and cell-type-specific biological network inference. It is likely to provide  
396 new visions of deep learning deployment in single-cell biology. With the development and  
397 maintainness of DeepMAPS webserver, our long-term goal is to create a deep learning-  
398 based eco-community for AI-ready scMulti-omics data archiving, analyzing, visualizing,  
399 and disseminating.

400

401

## 402 **Methods**

### 403 **Data preprocessing and data integration**

#### 404 *Multiple scRNA-seq data*

405 DeepMaps takes the raw scRNA-seq gene expression profiles as input. Only genes that  
406 are expressed in more than 0.1% of total cells, and cells with a minimum of 0.1% genes  
407 expressed were kept. To integrate multiple scRNA-seq, we first reduce the dimension of  
408 multiple scRNA-seq in low-dimensional space by canonical correlation analysis (CCA) and  
409 search for mutual nearest neighbors (MNNs) in the shared low-dimensional space  
410 (integration method used in Seurat v3). It then calculated vector of each cell and for  
411 correcting gene expressions in different datasets. The output is an integrated matrix with  
412 combined cells from all datasets and shared genes with normalized and scaled expression  
413 values of  $x'_{ij}$  for gene  $i$  in cell  $j$ .

414

#### 415 *CITE-seq data*

416 We also first removed low-quality genes and cells as described above. We applied log  
417 normalization on the RNA matrix and centered log-ratio (CLR) transformation on the  
418 protein matrix as below:

$$419 \text{Lognormalize}(x_{ij}) = \log\left(1 + \frac{x_{ij} \times 1e4}{\|\{x_i.\}\|}\right) \quad (1)$$

$$420 \text{CLRnormalize}(x_{ij}) = \log\left(1 + \frac{x_{ij}}{L_j}\right) \quad (2)$$

421 where  $x_{ij}$  represent for the expression of either a gene or protein in a cell. The top 2,000  
422 highly variable genes in the RNA matrix were spliced with the protein matrix and performed  
423 a joint normalization as below:

$$424 x'_{ij} = \exp\left(\frac{\sum_j \log(1 + x_{ij})}{\|K_i\|}\right), \quad (3)$$

425 where  $x_{ij}$  represents the expression for gene/protein  $i$  in cell  $j$ , and  $\|K_j\|$  represents the  
426 sum of expressed values in of that gene/protein.

427

#### 428 *Matched scRNA-seq and scATAC-seq data (scRNA-ATAC-seq)*

429 Data filtering and quality control were performed as usual. We first annotated peak regions  
430 in the scATAC-seq based on the method described in MAESTRO<sup>36</sup>. The regulatory  
431 potential  $R_{ij}$  of each  $peak_j$  to each  $gene_i$  are calculated independently by the exponential  
432 weight decay with the distance from the peak to the transcription start site (TSS):

$$433 R_{ij} = \begin{cases} 0, & d_{ij} > 150\text{kb or } peak_i \text{ located in any nearby genes} \\ \frac{1}{l}, & peak_j \text{ located at the exons region of the } gene_i \\ 2^{-\frac{d_{ij}}{d_0}}, & \text{else} \end{cases} \quad (4)$$

434 where  $d_{ij}$  is the distance between the center of  $peak_j$  and the TSS of  $gene_i$ . The default



435  $d_0$  is set to 10kb. If a  $peak_j$  is located at the exon regions of the  $gene_i$ , the regulatory  
 436 potential  $R_{ij}$  will be normalized by the length of the exon region  $l$ . To ensure computational  
 437 efficiency, we set the  $R_{ij}$  as 0 if the  $peak_j$  to TSS of  $gene_i$  distance is over 150 kb. The  
 438 default parameters were applied. The gene regulatory activity  $A_{ik}$  of  $gene_i$  in  $cell_k$   
 439 is defined as:

$$440 \quad A_{ik} = \sum_i R_{ij} P_{jk}, \quad (5)$$

441 where  $P_{jk}$  is the binary value in the scATAC-seq count matrix of  $peak_j$  in  $cell_k$ .

442 We assume that the activity of a gene to a cell is determined by both gene expression  
 443 activity and gene regulatory activity while with different contributions. Different than the  
 444 contribution weights determined directly based on the expression and chromatin  
 445 accessibility values in Seurat v4 (weighted nearest neighbor)<sup>5</sup>, we hypothesized that the  
 446 contribution relation of gene expression and chromatin accessibility is dynamic to the  
 447 future state of the cell, which can be estimated by RNA velocity. The RNA velocity is  
 448 determined by the abundance of unspliced and spliced mRNA in a cell. The amount of  
 449 unspliced mRNA is determined by gene regulation and gene transcription rate (which is  
 450 considered to be the same among genes), and the amount of spliced mRNA is determined  
 451 by the difference between unspliced mRNA and degraded mRNA. We assume that for  
 452 genes with positive RNA velocities, there are higher potentials to drive genes to be  
 453 transcribed. Thus, its regulatory activity related to chromatin accessibility has a higher  
 454 influence than the gene expression in defining the overall gene activity in a cell of the  
 455 current snapshot; for genes with negative velocities, on the other hand, the transcription  
 456 rate tend to be decelerated, and regulatory activity has less influence to the cell than gene  
 457 expression activity. We define a gene activity score (GAS) of  $gene_i$  in  $cell_k$ , which  
 458 integrates RNA and ATAC information, is defined as:

$$459 \quad GAS_{ik} = \begin{cases} E_{ik} \cdot \sum_k E_{ik} + (1 + b^{v^+}) A_{ik} \cdot \left( (1 + b^{v^+}) \sum_k A_{ik} \right), & \text{for } v_{ik} > 0 \\ E_{ik} \cdot \sum_k E_{ik} + (1 - b^{v^-}) A_{ik} \cdot \left( (1 + b^{v^+}) \sum_k A_{ik} \right), & \text{for } v_{ik} < 0 \\ E_{ik} \cdot \sum_k E_{ik} + A_{ik} \cdot \sum_k A_{ik}, & \text{for } v_{ik} = 0 \end{cases} \quad (6)$$

460 where  $E_{ik}$  and  $A_{ik}$  represents the gene expression activity and gene regulatory activity,  
 461 respectively, of  $gene_i$  in  $cell_k$  which are normalized by rows.  $v_{ik}$  represents the RNA  
 462 velocity of  $gene_i$  in  $cell_k$ , calculated by using CellRank<sup>37</sup>. The weighted of scATAC-seq is  
 463 defined as:

$$464 \quad b^+ = \frac{\sqrt{(|V_{,k}^+| - \text{rank}(v_{ik}|V_{,k}^+))^2 + (|V_i^+| - \text{rank}(v_{ik}|V_i^+))^2}}{\sqrt{(|V_{,k}^+| - 1)^2 + (|V_i^+| - 1)^2}} \quad (7)$$

$$b^- = \frac{\sqrt{\left(|V_{,k}^-| - \text{rank}(v_{ik}|V_{,k}^-)\right)^2 + \left(|V_{i,-}^-| - \text{rank}(v_{ik}|V_{i,-}^-)\right)^2}}{\sqrt{\left(|V_{,k}^-| - 1\right)^2 + \left(|V_{i,-}^-| - 1\right)^2}} \quad (8)$$

466 where  $V_{i,-}^+$  is the positive velocity in *gene<sub>i</sub>*,  $V_{i,-}^-$  is the negative velocity in *gene<sub>i</sub>*. And  $V_{,k}^+$  is  
 467 the positive velocity in *cell<sub>k</sub>*,  $V_{,k}^-$  is the negative velocity in *cell<sub>k</sub>*.

468

### 469 **Construction of gene-cell heterogeneous graph**

470 For any scMulti-omics data type, we now obtain a matrix that integrates information from  
 471 both modalities, with columns as cells and rows as genes only. Values in the integrated  
 472 matrix represent for either normalized gene expressions (for multiple scRNA-seq and  
 473 CITE-seq) or GAS (for scRNA-ATAC-seq). Given an integrated matrix  $X \in \mathbb{R}^{N \times M}$  with  $N$   
 474 cells and  $M$  genes generated in the last step, we denote a heterogeneous graph  $G =$   
 475  $(V_C, V_G, E)$ , where  $V_C = \{c_1, c_2, \dots, c_N\} \in \mathbb{R}^N$  and  $V_G = \{g_1, g_1, \dots, g_M\} \in \mathbb{R}^M$  represents for all  
 476 cells and genes in  $X$ , respectively, and  $E = \{e_{ij}\}$  represents for the edge between  $c_i$  and  
 477  $g_j$  with the weight corresponding to gene expression of  $g_j$  in  $c_i$ . To learn an initial  
 478 embedding of each node ( $c_i$  and  $g_j$ ) in the matrix  $X$ , a feature autoencoder with two deep  
 479 learning layers of dense networks in both encoder and decoder was used. The training  
 480 objective of this feature autoencoder is to achieve a maximum similarity between  $X$  and  
 481 reconstructed matrix  $X'$  by minimizing the mean squared error (MSE):

$$482 \quad \sum (X - X_g)^2, \text{ and } \sum (X - X_c)^2 \quad (9)$$

483 We denote the initial embedding for each  $c_i$  and  $g_j$  as  $H_{c_i}^0$  and  $H_{g_j}^0$ .

484

### 485 **Learning joint embeddings via a heterogeneous graph transformer**

486 We propose an unsupervised HGT framework<sup>14, 15</sup> to learn joint embeddings of  $c_i$  and  $g_j$ .  
 487 Given a heterogeneous bipartite graph  $G = (V_C, V_G, E)$ , DeepMAPS extracts all linked cell-  
 488 gene node pairs which are denoted as  $(s, t)$ , where  $t$  means the target node and  $s$  means  
 489 the neighbor node of  $t$ . The training processes consist of the following four steps: 1)  
 490 calculate multi-head attention; 2) pass heterogeneous message; 3) aggregate neighbors'  
 491 information; 4) calculate loss function. We also denote the embedding of the  $l$ th HGT  
 492 layer as  $\mathcal{H}^l$ . To learn joint embeddings of  $c_i$  and  $g_j$ , we aggregate information from  $s$  to  
 493 get a contextualized representation for  $t$  and simultaneously learn the representations of  
 494  $V_C$  and  $V_G$ . It is noteworthy that, to handle the heterogeneous relations in the graph,  
 495 attention will be calculated via multiple heads, where each node type (cell node and gene  
 496 node) has a unique head in attention and is linearly projected to a low dimensional space  
 497 to maximally model the distribution differences.

498

499 *1) Calculate multi-head attention.*

500 We extract all linked node pairs, where a target node  $v_t \in \{V_C, V_G\}$  is directly linked to its

501 source (neighbor) node  $v_s = \{V_C, V_G\}$  through edge  $e$ . The contextualized representation of  
 502  $v_t$  on the  $l$ th layer is denoted as  $\mathcal{H}^l[v_t]$ , which can be learned by its own presentation  
 503  $\mathcal{H}^{l-1}[v_t]$  and its neighbor  $\mathcal{H}^{l-1}[v_s]$  from the  $(l-1)$ th layer, where  $l \geq 1$ . The overall model  
 504 is formulated as:

$$505 \quad \mathcal{H}^l[v_t] \leftarrow \underset{v_s, t \in V, \forall e \in E}{Aggregate}(\mathcal{H}^{l-1}[Attention(v_s, v_t, e) \cdot Message(v_s)]), \quad (10)$$

506 where *Attention* estimates the importance of each neighbor; *Message* extracts the  
 507 information passed from the neighbors; *Aggregate* is the final step to aggregate the  
 508 neighborhood message by the attention weight.

509 The multi-head attention is proposed in the attention level to calculate  $h$ -head  
 510 attention for each edge  $e = (v_s, v_t)$ . Each target node  $t$  in the head  $h \in \{1, 2, \dots, H\}$  was  
 511 mapped into a target-node vector  $T^h(v_t)$  in each HGT layer via linear projection

512  $T_{\tau(t)}^h: R^d \rightarrow \times R^{\frac{d}{H}}$ , where  $d$  is the dimension of initial node feature,  $H$  is the number of heads,

513 and  $\frac{d}{H}$  is the feature dimension per head. Similarly, each neighbor node  $s$  in the head  $h$

514 was mapped into a key vector  $K^h(v_s)$  with a linear projection  $K_{\tau(s)}^h: R^d \rightarrow \times R^{\frac{d}{H}}$ . The  
 515 similarity between the queries and keys is measured (e.g., scaled dot product operator)  
 516 as attention.

$$517 \quad T^h(v_t) = T_{\tau(t)}^h(\mathcal{H}^{(l-1)}[v_t]), \quad (11)$$

$$518 \quad K^h(v_s) = K_{\tau(s)}^h(\mathcal{H}^{(l-1)}[v_s]), \quad (12)$$

519 Then we calculate the multi-head attention value for source node  $s$  to target node  $t$  by the  
 520 dot product. To maximize parameter sharing while still maintaining the specific  
 521 characteristics of different relations, we propose to parameterize weight matrices  $W_{\phi(e)}^{ATT}$  of  
 522 the interaction operators. The  $i$ th head attention can be defined as:

$$523 \quad ATThead^h(v_s, v_t, e) = (K^h(v_s)W_{\phi(e)}^{ATT}Q^h(v_t)^T) \cdot \frac{\mu\langle\tau(v_s), \tau(v_t)\rangle}{\sqrt{d}}, \quad (13)$$

524 where  $T$  is the transposal function,  $\mu$  is a prior tensor to denote the significance of each  
 525 edge  $e$ , serving as an adaptive scaling to the attention. The attention score in the  $h$ th  
 526 head in the  $l$ th layer is defined as:

$$527 \quad Att(v_s, v_t, e) = \underset{v_s \in V(t)}{\text{Softmax}} \left( \parallel ATThead^h(v_s, v_t, e) \right). \quad (14)$$

528

529 **2) Pass heterogeneous message.**

530 To alleviate the distribution differences of different types of nodes and edges, we  
 531 incorporate the types of edges into the message passing. The  $h$ th head message for each  
 532 edge  $(s, t)$  can be defined as:

$$533 \quad M^h(v_s, v_t, e) = M_{\tau(s)}^h(\mathcal{H}^{l-1}[v_s])W_{\phi(e)}^{MSG} \quad (15)$$

534 where each source node  $s$  in the head  $i$  was mapped into a message vector by a linear  
 535 projection  $M_{type(s)}^h: R^d \rightarrow R^{\frac{d}{H}}$ ,  $W_e^{MSG} \in R^{\frac{d}{H} \times \frac{d}{H}}$  is a distinct edge-based matrix for each  
 536 edge,  $e$  is the edge type of the heterogeneous graph. After multi-head aggregate, the  
 537 degree of message passing can be defined as:

$$538 \quad Msg(v_s, v_t, e) = \bigoplus_H head^h(v_s, v_t) \quad (16)$$

539

### 540 3) Aggregate neighbors' information.

541 To obtain the represents of each node, we need to aggregate multi-head attention and  
 542 message. The attention vectors can be regarded as the weight for message representation.  
 543 The representation of target nodes  $\mathcal{H}^l[v_t]$  can be updated as:

$$544 \quad \mathcal{H}^l[v_t] = A_{Linear\ type(t)} \left( \sigma \left( \bigoplus_{\forall s \in N(t)} (Att(v_s, v_t, e) \cdot Msg(v_s, v_t, e)) \right) \right) + \mathcal{H}^{l-1}[v_t] \quad (17)$$

545

### 546 4) Calculate loss function.

547 The original application of HGT was to solve node classification problems. Here, to train  
 548 cell and gene embeddings without supervised classification labels, we use a graph  
 549 autoencoder (GAE) framework. The whole HGT structure was deployed as an encoder in  
 550 the GAE, and we defined two embedding matrices  $E_c$  and  $E_g$  recording the trained  
 551 embeddings of cells and genes from the HGT encoder with both columns representing the  
 552 same embedding dimensions, and rows representing cells and genes, respectively. A  
 553 decoder was used to reconstruct the heterogeneous graph by the inner product of  $E_c$  and  
 554  $E_g$ . The loss function of GAE is defined as:

$$555 \quad loss = \sum_i [p(x_i) \log p(x_i) - p(x_i) \log q(x_i)], \quad (18)$$

556 where  $p(x_i)$  and  $q(x_i)$  represents the softmax operation for the  $i$ th row of  $E_c$  and  $E_g$ .

557

### 558 **HGT training on subgraphs**

559 To handle the efficiency and capability of applying HGT on such a giant heterogeneous  
 560 graph (tens of thousands of nodes and millions of edges), we performed model training  
 561 on subgraphs and multiple mini-batches based on the idea of HGSampling<sup>14</sup>. The core of  
 562 HGSampling is to sample heterogeneous subgraphs with similar proportions in different  
 563 type of nodes which can avoid sampling highly imbalanced subgraph in training process.  
 564 We sample `n_batch` number of subgraphs for each epoch training, and the one-hot of each  
 565 node will be put into the trained model to obtain all node embedding. Given a node  $t$  which  
 566 has been sampled, a dictionary  $D[\tau]$  for each node type  $\tau$ , we add all the first-neighbor  
 567 node of  $t$  into the corresponding  $D[\tau]$  and add  $t$ 's normalized degree to these neighbors to

568 calculate the sampling probability  $p$ .

$$569 \quad p[\tau][s] = \frac{D[\tau][s]^2}{\|D[\tau]\|^2}, \quad (19)$$

570 where  $p[\tau][s]$  is the sampling probability for each source node  $s$  of type  $\tau$ ,  $D[\tau]$  is all node  
571 for type  $\tau$  with the normalized degree,  $\|\cdot\|$  is the 2-norm,  $D[\tau][s]$  is the normalized degree  
572 for source node  $s$  of node type  $\tau$ . Then we sampled all types of nodes according to the  
573 probability in  $D[\tau]$ , and moved them out of  $D[\tau]$ . We repeated this sampling for 50 times  
574 to obtain 50 subgraphs that maximize the coverage of the whole heterogeneous graph,  
575 and each subgraph was trained with 100 epochs.

576

### 577 **Cell clustering and cell-type-active gene association network prediction**

#### 578 *Cell clustering.*

579 We applied the Louvain clustering method (igraph v1.2.7, R package) to predict cell  
580 clusters on cell-embedding matrix  $E_c$ .

581

#### 582 *Attention-based gene module detection.*

583 To infer the connection of genes and cell clusters, we extract the attention value of gene  
584  $g$  to cell  $c$  in head  $i$  through the step of multi-head attention calculation. We define the  
585 importance  $I$  of  $g$  to  $c$  as:

$$586 \quad I(g, c) = \sqrt{\sum_H ATThead^h(g, c)^2} \quad (20)$$

587 We assign genes to each cell with a threshold of  $mean_g(I(g, c)) + sd_g(I(g, c))$ . The gene  
588  $g$  is considered to be one of the active genes in cell  $c$ , if the  $I$  is higher than the threshold.

589

#### 590 *The Steiner Forest Problem (SFP) model*

591 We build an SFP model on a heterogeneous graph to extract the most critical gene-gene  
592 and gene-cell relations contributing to the gene module specificity in a cell cluster. The  
593 input of this model includes three parts:

- 594 1. Gene-gene relations defined by the embedding (resulted from GAE) Pearson's  
595 correlation between genes ( $E$ ),
- 596 2. Gene-cell relations are defined by the attention score of a gene to a cell ( $F$ ),
- 597 3. A set of cell clusters,  $\{V_i, i = 1, 2, \dots, k\}$ , predicted by the HGT model.

598

599 We define a weighted heterogeneous graph,  $G = (U \cup V, E \cup F)$ , in which nodes represent  
600 genes ( $U$ ) and cells ( $V = \cup_i V_i$ ), edges  $S$  represent both gene-gene ( $E$ ) and gene-cell ( $F$ )  
601 relations. We formulate this problem using a combinatorial optimization model defined as  
602 below

603

$$\min_{S \subseteq E \cup F} \sum_{e \in S} w(e) \quad (21)$$

605

606 s.t.

$$r_S(u, v) = 1, \forall u, v \in V_i, i = 1, 2, \dots, k. \quad (22)$$

608

609 where  $r_S(u, v)$  is a binary indicator function to represent whether two nodes,  $u$  and  $v$ , are  
 610 connected (1) or not (0) in the subgraph induced by  $S$  in  $G$ . We aim to identify the minimum  
 611 weighted edge set,  $S$ , from the heterogeneous graph  $G$ , so that cells in the same cell type  
 612 could be connected to each other via edges in  $S$ .

613

614 First, in view of the huge size of  $G$ , containing  $|U \cup V|$  nodes and  $|E \cup F|$  edges, we  
 615 convert  $G$  into a sparser graph,  $G'$ , by iteratively finding a global alignment between genes  
 616 and cells based on the gene-cell edges, using the maximum matching theory<sup>38</sup>. In graph  
 617 theory, a matching or independent edge set in an undirected graph is a set of edges  
 618 without common nodes, and a maximum matching in a weighted graph is a matching  $M$   
 619 that yields the maximum sum of edge weights. To fulfill this task, we build a weighted  
 620 bipartite graph,  $G^B = (U \cup V, F)$ , by only retaining the gene-cell edges, i.e.,  $F$ . The  
 621 objective is to identify an edge subset,  $M$ , to satisfy

622

$$\max_{M \subseteq F} \sum_{e \in M} w(e). \quad (23)$$

624

625 We calculate the  $M$  of  $G^B$  using the igraph R package<sup>39</sup>. Then, we remove the cell nodes  
 626 incident by edges in  $M$ . Repeat the prediction of maximum matching and deletion of cell  
 627 nodes incident to edges in previously identified maximum matchings, until there is no cell  
 628 node in the remaining graph. We compute the union of all the matchings as  $F'$ , and then  
 629 construct  $G' = (U \cup V, E \cup F')$ . Finally, the weights of gene-cell edges,  $F'$ , and gene-gene  
 630 edges,  $E$ , are normalized by the following two functions, respectively.

$$\frac{\max(w(F')) - w(F')}{\max(w(F')) - \min(w(F'))} \quad (24)$$

631

$$\frac{\max(w(E)) - w(E)}{\max(w(E)) - \min(w(E))} \quad (25)$$

632

633 Second, we find the edge set,  $S$ , of the Steiner forest,  $T$ , as follows. To begin with, we  
 634 utilize the igraph R package to calculate a minimum spanning forest (MSF)<sup>38</sup>,  $T$ , of  $G'$ . A  
 635 MSF means that each pair of nodes in the same connected component could be  
 636 connected to each other. Herein, we only need the edges to connect cell nodes belonging  
 637 to the same cell type. Therefore, we iteratively remove the gene nodes with degree one  
 638 from  $T$ , until no gene node with degree one exists in  $T$ . Finally, we output the edge set of

639  $T$ , i.e.,  $S$ , as the solution to the SFP model.

640

641 For each connected component of the Steiner forest, the gene-gene edges denote the co-  
642 expression relations among genes in the same module, while the set of gene-cell edges  
643 represents the cell type specificity of this gene module, and this module is a cell-type-  
644 active gene module.

645

### 646 **Construct gene regulatory network from scRNA-ATAC-seq data**

647 *Infer master TFs and GRNs in each cell type.*

648 To quantify the intensity of genes regulated by TFs, we design regulatory intensive (RI)  
649 score, which can be decomposed into two components as: 1) the regulatory potential ( $R_{ij}$ )  
650 of peaks calculated in the preprocessing step, and 2) the binding affinity (BA) score of TFs  
651 to the peaks. The TF binding profiles were obtained from JASPAR database. To reduce  
652 false positives of binding site, we select significance binding sites with transformed  $p$ -  
653 values for TF binding profile matches less than  $1e-04$ . The BA score is the transformed  
654 relative score which obtained from TF binding profiles. Then the RI score  $RI_{L,i,k}$  of TF  $L$   
655 to the gene  $i$  in the cell  $k$  is defined as:

$$656 \quad RI_{L,i,k} = \sum_p BA_{L,p} \cdot R_{ij} \quad (26)$$

657 Master TFs are genes at the top of a gene regulation hierarchy, particularly in regulatory  
658 pathways related to cell fate and differentiation. To infer cell type master TFs, we construct  
659 cell-type-specific GRN with RI score as edges weight and calculate centrality which  
660 reflects the importance of each node in the network to rank the TFs in each cell type. TFs  
661 with high ranked are regarded as master TFs. Consider the RI score of TFs to genes,  
662 eigenvector centrality which assigns relative scores to all nodes in the network based on  
663 the concept that connections to high-scoring nodes contribute more to the score of the  
664 node in question than equal connections to low-scoring nodes is applied to infer master  
665 TFs. The eigenvector centrality of a node  $v$  in GRN can be defined as:

$$666 \quad C_v = \alpha_{max}(v) \quad (27)$$

667 Where  $\alpha_{max}$  is the eigenvector corresponding to the largest eigenvalue of the weighted  
668 adjacency matrix of a GRN.

669

### 670 *Identity differential regulon (CTSRs)*

671 To detect regulon associated with disease states, we identify CTSRs by logFC and  
672 Wilcoxon rank-sum test. For a cell type active regulon, we define a regulon activity score  
673 (RAS) as:

$$674 \quad RAS(TF, CT) = \frac{\sum_i \sum_{k \in CT} GAS_{i,k} \cdot RI_{L,i,k}}{NG}, \quad (28)$$

675 where  $L$  means TF,  $i$  means gene and  $k$  means cell.  $N$  is the cell number in a cell type,  $G$   
676 is the gene number in the regulon  $L - CT$ . Then we construct a RAS matrix with  $|L - CT|$   
677 rows,  $|CT|$  columns. The significance of difference is calculated using the Wilcoxon rank-

678 sum test. If the BH-adjusted  $p$ -value is less than 0.05 between different cell clusters and  
679 log fold change larger than 0.25, we consider the regulon is differentially active in this  
680 cluster and defined as a CTSR.

681

### 682 **Benchmarking quantification and statistics**

#### 683 *Adjusted rand index (ARI)*

684 ARI is used to compute similarities by considering all pairs of the samples that are  
685 assigned in clusters in the current and previous clustering adjusted by random permutation.  
686 To calculate ARI, a contingency table is built to summarize the overlaps between the two  
687 cell label lists with  $n$  elements (cells). Each entry denotes the number of objects in common  
688 between the two label lists. The *ARI* score can be calculated as:

$$689 \quad ARI = \frac{RI - E[RI]}{\max(RI) - E[RI]} \quad (29)$$

690 where  $RI$  is the unadjusted rand index which defined as:

$$691 \quad RI = \frac{a + b}{C_n^2} \quad (30)$$

692

#### 693 *Average Silhouette Weight (ASW)*

694 Different from ARI which requires known ground truth labels, silhouette refers to a method  
695 of interpretation and validation of consistency within clusters of data. The silhouette value  
696 is a measure of how similar an object is to its luster (cohesion) compared to other clusters  
697 (separation). The silhouette ranges from  $-1$  to  $+1$ , where a high value indicates that the  
698 object is well matched to its cluster and poorly matched to neighboring clusters. The  
699 silhouette score  $s(i)$  can be calculated by:

$$700 \quad s(i) = \frac{b(i) - a(i)}{\max\{a(i), b(i)\}} = \begin{cases} 1 - \frac{a(i)}{b(i)}, & \text{if } a(i) < b(i) \\ 0, & \text{if } a(i) = b(i) \\ \frac{b(i)}{a(i)} - 1, & \text{if } a(i) > b(i) \end{cases} \quad (31)$$

701 where  $a(i)$  is the average distance between a cell  $i$  and all other cells in the same cluster,  
702 and  $b(i)$  be the average distance of  $i$  to all cell in the nearest cluster to which  $i$  does not  
703 belong. We take the average silhouette of all cells in a cluster as the average silhouette  
704 weight (ASW) to represent the whole cell cluster.

705

#### 706 *Closeness centrality (CC)*

707 The closeness centrality (CC)<sup>40</sup> of a vertex  $u$  is defined by the inverse of the sum length  
708 of the shortest paths to all the other vertices  $v$  in the undirected weighted graph. The  
709 formulation is defined as:

$$710 \quad CC(u) = \frac{1}{\sum_{i \neq j} d_w(u, v)} \quad (32)$$

711 Where  $d_w(u, v)$  is the shortest weighted paths between  $u$  and  $v$ . If there is no path



712 between vertex  $u$  and  $v$ , the total number of vertices is used in the formula instead of the  
713 path length. The CC is calculated by R package igraph with function `igraph::betweenness`.

714

### 715 *Eigenvector centrality (EC)*

716 Eigenvector centrality (EC)<sup>41</sup> scores correspond to the values of the first eigenvector of  
717 the graph adjacency matrix. The EC score of vertex  $u$  is defined as:

$$718 \quad EC(u) = x_u = c \sum_{v \in g} a_{uv} x_v \quad (33)$$

719 Where  $c$  is inverse of the eigenvalues of eigenvector  $x = [x_1, x_2, \dots, x_n]$ ,  $a_{uv}$  is the  
720 weighted adjacent matrix of undirect graph  $g$ . The EC is calculated by R package igraph  
721 with function `igraph::evcent`.

722

### 723 *Pathway enrichment test*

724 To evaluate the function of the regulatory network, we use pathway enrichment analysis<sup>42</sup>  
725 to identify pathways that are significantly represented in each cell cluster active regulon,  
726 and count the number of regulon-enriched pathways. The pathway enrichment analysis is  
727 done by R package `enrichR`<sup>43</sup>.

728

### 729 *Robustness evaluation*

#### 730 *Cell cluster leave-out test*

731 For a benchmark dataset with a real cell type label, we removed all cells in one cell type  
732 and ran DeepMAPS. We traverse all cell types (one at a time) to evaluate the robustness  
733 with ARI. For data without benchmark labels, we removed cells in predicted cell clusters  
734 from DeepMAPS and other benchmark tools, respectively.

735

#### 736 *Read depth simulation test*

737 We performed a downsampling simulation for gene expressions to test the robustness of  
738 DeepMAPS to read depth. Let matrix  $C$  be the  $N \times M$  expression count matrix, where  $N$   
739 is the number of cells and  $M$  is the number of genes. Define the cell sequencing depths  
740  $c_i = \sum_{j=1}^M C_{ij}$ , i.e., the column sums of  $C$ . Thus, the average sequencing depth of the

741 experiment is  $\bar{c} = \frac{\sum_{i=1}^N c_i}{N}$ . Let  $t < \bar{c}$  be our target downsampled sequencing depth and let

742  $C^*$  be the  $N \times M$  downsampled matrix. We perform the downsampling as follows:

743 For each spot  $i = 1, \dots, N$ :

- 744 1) Define the total counts to be sampled in the cell  $i$  as  $t_i = \frac{t \times c_i}{\bar{c}}$ .
- 745 2) Construct the character vector of genes to be sampled as  $G_i =$   
746  $\{\underbrace{1, \dots, 1}_{c_{i1}}, \underbrace{2, \dots, 2}_{c_{i2}}, \dots, \underbrace{M, \dots, M}_{c_{iM}}\}$ .
- 747 3) Sample  $t_i$  elements from  $G_i$  without replacement and define  $N_j$  as the number of  
748 times gene  $j$  was sampled from  $G_i$  for  $j = 1, \dots, M$ .

749 4) Let  $C_{ij}^* = N_j$ .

750 Using this method, the average downsampled sequencing depth is:

751 
$$\bar{C}^* = \frac{\frac{t}{\bar{c}}c_1 + \frac{t}{\bar{c}}c_2 + \dots + \frac{t}{\bar{c}}c_n}{N} = \frac{\frac{t}{\bar{c}}\sum_{i=1}^N c_i}{N} = \frac{t}{\bar{c}} \times \bar{c} = t \quad (34)$$

752 as desired. Note that, this method preserves the relative total counts of each cell, i.e.,  
753 cells that had higher sequencing depths in the original matrix have proportionally higher  
754 depths in the downsampled matrix.

755

### 756 **Comparisons with existing tools**

757 In order to assess the performance of DeepMAPS alongside other proposed scMulti-omics  
758 benchmark tools, we compare DeepMAPS with Seurat (v 3.2.3 and v 4.0.0,  
759 <https://github.com/satijalab/seurat>), MOFA+ (v 1.0.0, <https://github.com/bioFAM/MOFA2>),  
760 Harmony (v 0.1, <https://github.com/immunogenomics/harmony>), and TotalVI (v 0.10.0,  
761 <https://github.com/YosefLab/scvi-tools>). Due to the integration capability, DeepMAPS was  
762 compared with Seurat v 3.2.3 and Harmony on multiple scRNA-seq data, with Seurat  
763 v4.0.0, MOFA+, and TotalVI on CITE-seq data, and with Seurat 4.0.0 and MOFA+ on  
764 scRNA-ATAC-seq data. All benchmark tools used the default settings. We also evaluated  
765 the performance of gene association network inference with IRIS3<sup>11</sup> and a normal gene  
766 co-expression network inference method. Specifically, in IRIS3, cell-gene biclusters were  
767 first identified based on the QUBIC2 algorithm. Cell-type-active gene modules were  
768 identified in each cell cluster (using the same cell label predicted in DeepMAPS to ensure  
769 the comparability) by performing a cell-wise hypergeometric enrichment. On the other  
770 hand, all genes were selected to calculate a gene expression correlation score (Pearson's  
771 correlation) between any pairs of two genes using cells in one cell cluster. Gene pair  
772 expression correlations with a BH-adjusted p-value smaller than 0.05 were kept and used  
773 to build the overall co-expression network in one cell cluster. Co-expressed sub gene  
774 modules were inferred by performing Louvain clustering on the co-expression network.  
775 For scRNA-ATAC-seq data, we compared regulon and cell-type-specific regulon inferred  
776 from DeepMAPS with IRIS3 in terms of enriched biological pathways. Noted that, IRIS3  
777 only supports regulon inference from scRNA-seq data based on de novo motif findings;  
778 thus, here, we used the GAS matrix generated in DeepMAPS as an input of IRIS3.

779

### 780 **DeepMAPS server construction**

781 DeepMAPS runs on an HPE XL675d RHEL system with 2 x 128-core AMD EPYC 7H12  
782 CPU, 64GB RAM, and 2 x NVIDIA A100 40GB GPU. The backend is written in TypeScript  
783 using the NestJs framework. Auth0 is used as an independent module to provide user  
784 authentication and authorization services. Redis houses a queue of all pending analysis  
785 jobs. There are two types of jobs in DeepMAPS: The stateful jobs are handled by the  
786 Plumber R package to provide real-time interactive analysis; The stateless jobs, such as  
787 CPU-bound bioinformatics pipelines and GPU training tasks that could take a very long

788 time, are constructed using Nextflow. All the running jobs are orchestrated using Nomad,  
789 allowing each job to be assigned with proper cores and storage, as well as keeping the  
790 jobs scalable based on the server load. The job results are deposited to a MySQL  
791 database. The frontend is built with NUXT, Vuetify as the UI library, Apache ECharts, and  
792 Cytoscape.js for data visualization. The frontend server and backend server are  
793 communicated using REST API.

794

#### 795 **Data availability**

796 All data used for benchmarking and case study are collected from the public domain and  
797 can be retrieved using links or accession numbers provided in **Supplementary Tab. 1**.

798

#### 799 **Code availability**

800 The source code of DeepMAPS Docker is freely available at ([https://github.com/OSU-](https://github.com/OSU-BMBL/deepmaps)  
801 [BMBL/deepmaps](https://github.com/OSU-BMBL/deepmaps)). The DeepMAPS webserver is available at  
802 <https://bmblix.bmi.osumc.edu/>.

803

804

805 **References**

- 806 1. Stuart, T. & Satija, R. Integrative single-cell analysis. *Nat Rev Genet* **20**, 257-272  
807 (2019).
- 808 2. Ma, A., McDermaid, A., Xu, J., Chang, Y. & Ma, Q. Integrative Methods and  
809 Practical Challenges for Single-Cell Multi-omics. *Trends in Biotechnology* (2020).
- 810 3. Argelaguet, R., Cuomo, A.S.E., Stegle, O. & Marioni, J.C. Computational principles  
811 and challenges in single-cell data integration. *Nat Biotechnol* (2021).
- 812 4. S Teichmann, M.E. Method of the Year 2019: Single-cell multimodal omics. *Nat*  
813 *Methods* **17**, 1 (2020).
- 814 5. Hao, Y. et al. Integrated analysis of multimodal single-cell data. *Cell* **184**, 3573-  
815 3587.e3529 (2021).
- 816 6. Argelaguet, R. et al. MOFA+: a statistical framework for comprehensive integration  
817 of multi-modal single-cell data. *Genome Biology* **21**, 111 (2020).
- 818 7. Korsunsky, I. et al. Fast, sensitive and accurate integration of single-cell data with  
819 Harmony. *Nature Methods* **16**, 1289-1296 (2019).
- 820 8. Gayoso, A. et al. Joint probabilistic modeling of single-cell multi-omic data with  
821 totalVI. *Nature Methods* **18**, 272-282 (2021).
- 822 9. Li, Y. et al. Elucidation of Biological Networks across Complex Diseases Using  
823 Single-Cell Omics. *Trends Genet* (2020).
- 824 10. Aibar, S. et al. SCENIC: single-cell regulatory network inference and clustering.  
825 *Nat Methods* **14**, 1083-1086 (2017).
- 826 11. Ma, A. et al. IRIS3: integrated cell-type-specific regulon inference server from  
827 single-cell RNA-Seq. *Nucleic Acids Res* **48**, W275-W286 (2020).
- 828 12. Han, P., Gopalakrishnan, C., Yu, H. & Wang, E. Gene Regulatory Network Rewiring  
829 in the Immune Cells Associated with Cancer. *Genes (Basel)* **8**, 308 (2017).
- 830 13. Wang, J. et al. scGNN is a novel graph neural network framework for single-cell  
831 RNA-Seq analyses. *Nature Communications* **12**, 1882 (2021).
- 832 14. Hu, Z., Dong, Y., Wang, K. & Sun, Y. in Proceedings of The Web Conference 2020  
833 2704–2710 (Association for Computing Machinery, Taipei, Taiwan; 2020).
- 834 15. Wang, X. et al. in The World Wide Web Conference 2022–2032 (Association for  
835 Computing Machinery, San Francisco, CA, USA; 2019).
- 836 16. Zou, D. et al. in Advances in Neural Information Processing Systems 11247-11256  
837 (2019).
- 838 17. Jin, S. et al. Inference and analysis of cell-cell communication using CellChat.  
839 *Nature Communications* **12**, 1088 (2021).
- 840 18. Ampudia, J. et al. CD6-ALCAM signaling regulates multiple effector/memory T cell  
841 functions. *The Journal of Immunology* **204**, 150.113-150.113 (2020).
- 842 19. Skonier, J.E. et al. Mutational analysis of the CD6 ligand binding domain. *Protein*  
843 *Engineering, Design and Selection* **10**, 943-947 (1997).
- 844 20. Gimferrer, I. et al. Relevance of CD6-mediated interactions in T cell activation and  
845 proliferation. *Journal of immunology (Baltimore, Md. : 1950)* **173**, 2262-2270

- 846 (2004).
- 847 21. Johnston, R.J., Lee, P.S., Strop, P. & Smyth, M.J. Cancer Immunotherapy and the  
848 Nectin Family. *Annual Review of Cancer Biology* **5**, 203-219 (2021).
- 849 22. Li, X.-Y. et al. CD155 loss enhances tumor suppression via combined host and  
850 tumor-intrinsic mechanisms. *J Clin Invest* **128**, 2613-2625 (2018).
- 851 23. Li, K. et al. cellxgene VIP unleashes full power of interactive visualization, plotting  
852 and analysis of scRNA-seq data in the scale of millions of cells. *bioRxiv*,  
853 2020.2008.2028.270652 (2020).
- 854 24. Pereira, W. et al. Asc-Seurat – Analytical single-cell Seurat-based web application.  
855 *bioRxiv*, 2021.2003.2019.436196 (2021).
- 856 25. Gardeux, V., David, F.P.A., Shajkofci, A., Schwalie, P.C. & Deplancke, B. ASAP: a  
857 web-based platform for the analysis and interactive visualization of single-cell  
858 RNA-seq data. *Bioinformatics* **33**, 3123-3125 (2017).
- 859 26. Li, B. et al. Cumulus provides cloud-based data analysis for large-scale single-cell  
860 and single-nucleus RNA-seq. *Nature Methods* **17**, 793-798 (2020).
- 861 27. Hillje, R., Pelicci, P.G. & Luzi, L. Cerebro: interactive visualization of scRNA-seq  
862 data. *Bioinformatics* **36**, 2311-2313 (2019).
- 863 28. Prompsy, P. et al. Interactive analysis of single-cell epigenomic landscapes with  
864 ChromSCape. *Nature Communications* **11**, 5702 (2020).
- 865 29. Bolisetty, M.T., Stitzel, M.L. & Robson, P. CellView: Interactive exploration of high  
866 dimensional single cell RNA-seq data. *bioRxiv*, 123810 (2017).
- 867 30. Mohanraj, S. et al. CReSCENT: CanceR Single Cell ExpressioN Toolkit. *Nucleic  
868 Acids Research* **48**, W372-W379 (2020).
- 869 31. Patel, M.V. iS-CellR: a user-friendly tool for analyzing and visualizing single-cell  
870 RNA sequencing data. *Bioinformatics* **34**, 4305-4306 (2018).
- 871 32. Yousif, A., Drou, N., Rowe, J., Khalfan, M. & Gunsalus, K.C. NASQAR: a web-  
872 based platform for high-throughput sequencing data analysis and visualization.  
873 *BMC Bioinformatics* **21**, 267 (2020).
- 874 33. Zhu, Q. et al. PIVOT: platform for interactive analysis and visualization of  
875 transcriptomics data. *BMC Bioinformatics* **19**, 6 (2018).
- 876 34. Innes, B. & Bader, G. scClustViz Single-cell RNAseq cluster assessment and  
877 visualization [version 2; peer review: 2 approved]. *F1000Research* **7** (2019).
- 878 35. Granja, J.M. et al. ArchR is a scalable software package for integrative single-cell  
879 chromatin accessibility analysis. *Nat Genet* **53**, 403-411 (2021).
- 880 36. Wang, C. et al. Integrative analyses of single-cell transcriptome and regulome  
881 using MAESTRO. *Genome Biology* **21**, 198 (2020).
- 882 37. Lange, M. et al. CellRank for directed single-cell fate mapping. *bioRxiv*,  
883 2020.2010.2019.345983 (2020).
- 884 38. Diestel, R., Schrijver, A. & Seymour, P.D. in MATHEMATISCHES  
885 FORSCHUNGSINSTITUT OBERWOLFACH REPORT NO. 16/2007 (Citeseer,  
886 2007).

- 887 39. Csardi, G. & Nepusz, T. The igraph software package for complex network  
888 research. *InterJournal, complex systems* **1695**, 1-9 (2006).
- 889 40. Li, G.S., Li, M., Wang, J.X., Li, Y.H. & Pan, Y. United Neighborhood Closeness  
890 Centrality and Orthology for Predicting Essential Proteins. *Ieee Acm T Comput Bi*  
891 **17**, 1451-1458 (2020).
- 892 41. Parisutham, N. & Rethnasamy, N. Eigenvector centrality based algorithm for  
893 finding a maximal common connected vertex induced molecular substructure of  
894 two chemical graphs. *J Mol Struct* **1244** (2021).
- 895 42. Reimand, J. et al. Pathway enrichment analysis and visualization of omics data  
896 using g:Profiler, GSEA, Cytoscape and EnrichmentMap. *Nat Protoc* **14**, 482-517  
897 (2019).
- 898 43. Kuleshov, M.V. et al. Enrichr: a comprehensive gene set enrichment analysis web  
899 server 2016 update. *Nucleic Acids Res* **44**, W90-97 (2016).

900  
901  
902  
903  
904

905 **Acknowledgments**

906 This work was supported by awards R01-GM131399, R35-GM126985, and  
907 U54AG075931 from the National Institute of General Medical Sciences of the National  
908 Institutes of Health. The work was also supported by award NSF1945971 from the  
909 National Science Foundation. In addition, we thank Dr. Xin Gang from the Ohio State  
910 University (USA) for his contribution in helping annotate cell types in the three case studies,  
911 and Dr. Fei He from the Northeast Normal University (China) for his valued suggestions in  
912 framework construction and data testing.

913

914 **Contributions**

915 Q.M. and D.X. conceived the basic idea and designed the framework. X.W. and B.L. wrote  
916 the DeepMAPS code. C.W. built the backend and frontend server. S.G. designed dynamic  
917 figures on the server. Y.Liu carried out RNA velocity calculation. Y.Li designed the SFP  
918 model for gene module prediction. A.M, X.W., and J.L. carried out benchmark experiments.  
919 X.W., Y.C., and B.L. performed robustness tests. A.M., J.L., and T.X. carried out the case  
920 study. J.W., D.W., Y.J., J.L., and L.S. performed tool optimizations. A.M. lead the figure  
921 design and manuscript writing. All authors participated in interpretation and writing the  
922 manuscript.

923

924 **Corresponding author**

925 Correspondence to Prof. Qin Ma: Email: [qin.ma@osumc.edu](mailto:qin.ma@osumc.edu); Prof. Dong Xu:  
926 [xudong@missouri.edu](mailto:xudong@missouri.edu); Prof. Bingqiang Liu: [bingqiang@sdu.edu.cn](mailto:bingqiang@sdu.edu.cn).

927

928 **Ethics declarations**

929 **Competing interests**

930 *The authors declare no competing interests.*

931
